# Supplementary material for: The Combination of UHPLC-HRMS and Molecular Networking Improving Discovery Efficiency of Chemical Components in Chinese Classical Formula
Source: Research Square preprint supplement (doi:10.21203/rs.3.rs-443278/v1), 2021-04-27
Supplement: Supplementary file 1 [file 655442f3f7f0bc307542167d.docx]

The combination of UHPLC-HRMS and molecular networking improving discovery efficiency of chemical components in Chinese Classical Formula

Xiaoxia Xue 1,2,#, Qishu Jiao 1,#, Runa Jin 1, Xueyuan Wang 3, Shougang Shi 4, Zhengjun Huang 4, [Yuntao Da](https://www.sciencedirect.com/science/article/abs/pii/S0308814615004951#!)i 1,2,*, and Shilin Chen 1

**Author information**

1 Institute of Chinese Materia Medica, China Academy of Chinese Medical Sciences, 100700, Beijing, China; [xxxue1003@163.com](mailto:xxxue1003@163.com) (XX); [qs_jiao1108@bucm.edu.cn](mailto:qs_jiao1108@bucm.edu.cn) (QJ); [jrn11330@163.com](mailto:jrn11330@163.com) (RJ); slchen@icmm.ac.cn (CS)

2 Shanxi University of Chinese Medicine, 030619, Shanxi, China

3 Modern Research Center for Traditional Chinese Medicine, Shanxi University, Taiyuan 030006, China; [774740773@qq.com](mailto:774740773@qq.com) (XW)

4 Sunflower Pharmaceutical Group (Xiangyang) Longzhong Co.Ltd, 441003, Hubei, China; 497869216@qq.com (SS); xfhzj2007@163.com (ZH)

# Co-first author

* Correspondence: [ytdai@icmm.ac.cn](mailto:ytdai@icmm.ac.cn) (YD)


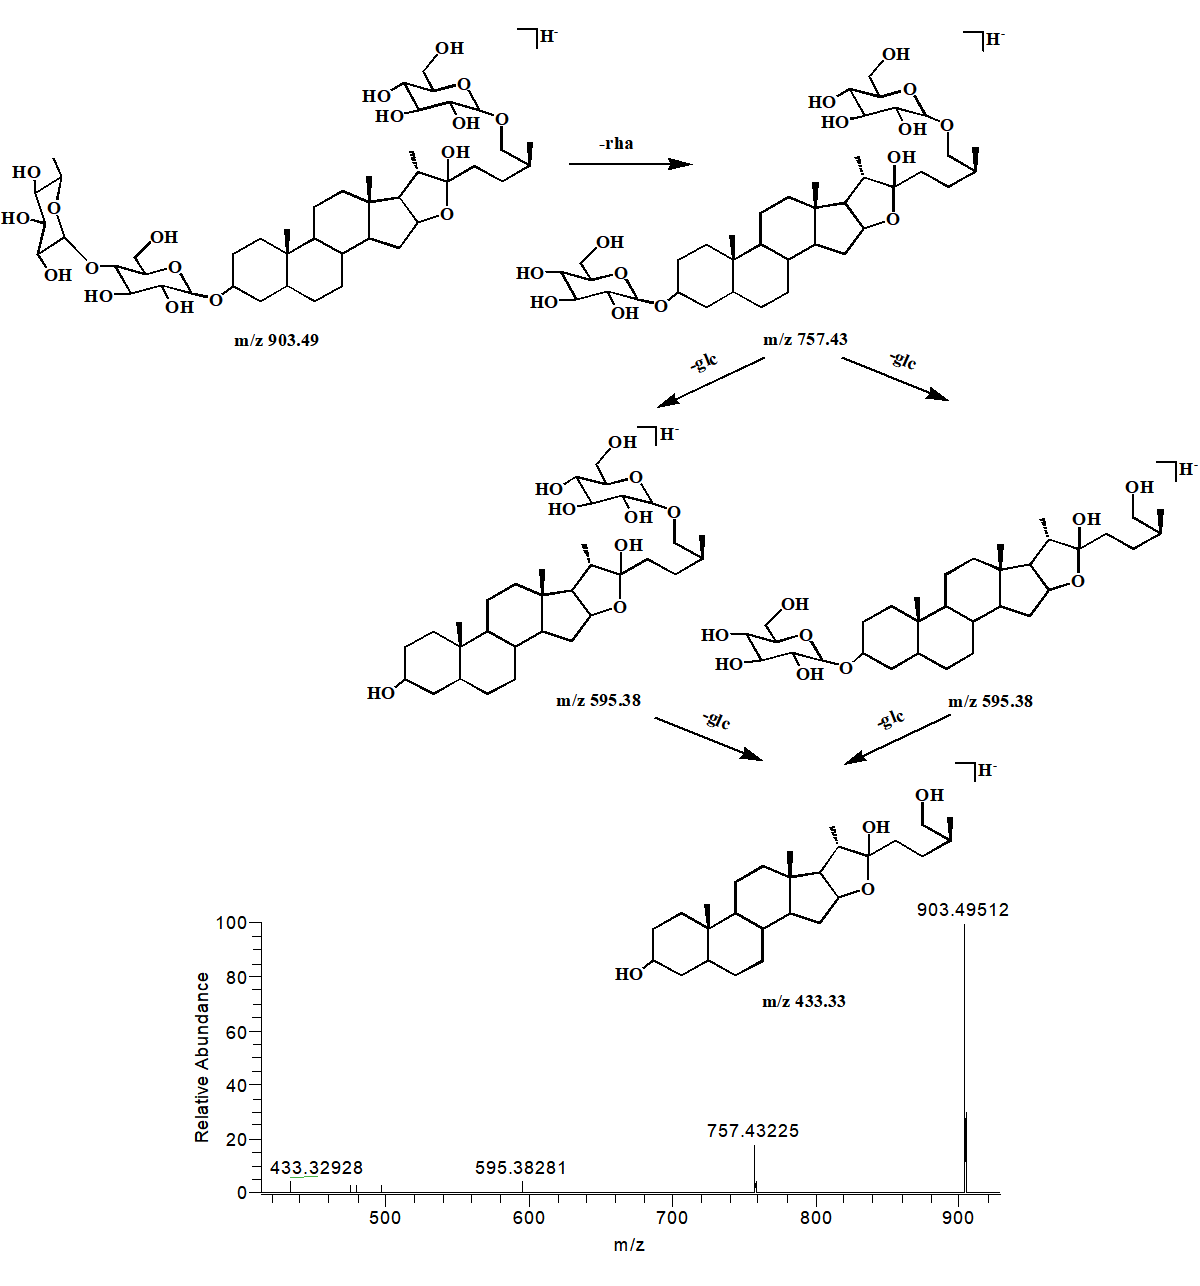


**Figure S1.** The proposed fragmentation pathways and the MS/MS spectra for aspacochioside A in the negative mode.


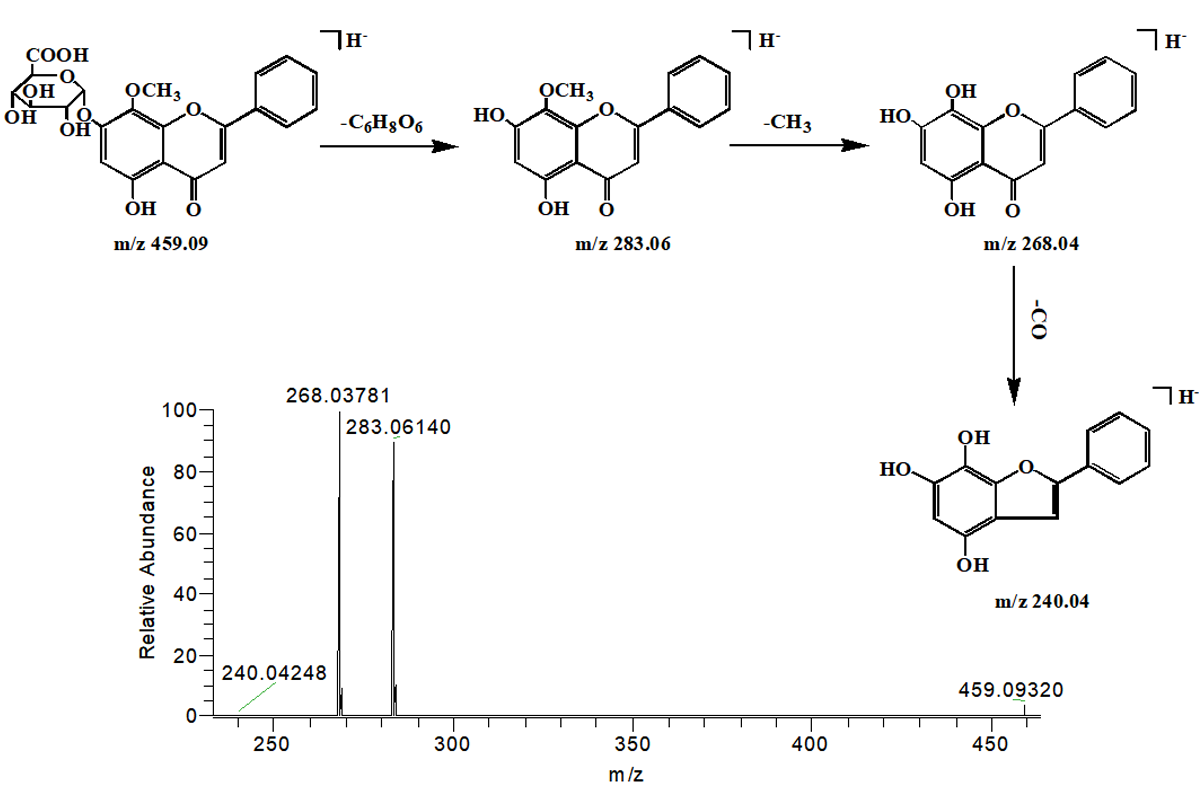


**Figure S2.** The proposed fragmentation pathways and the MS/MS spectra for wogonoside in the negative mode.


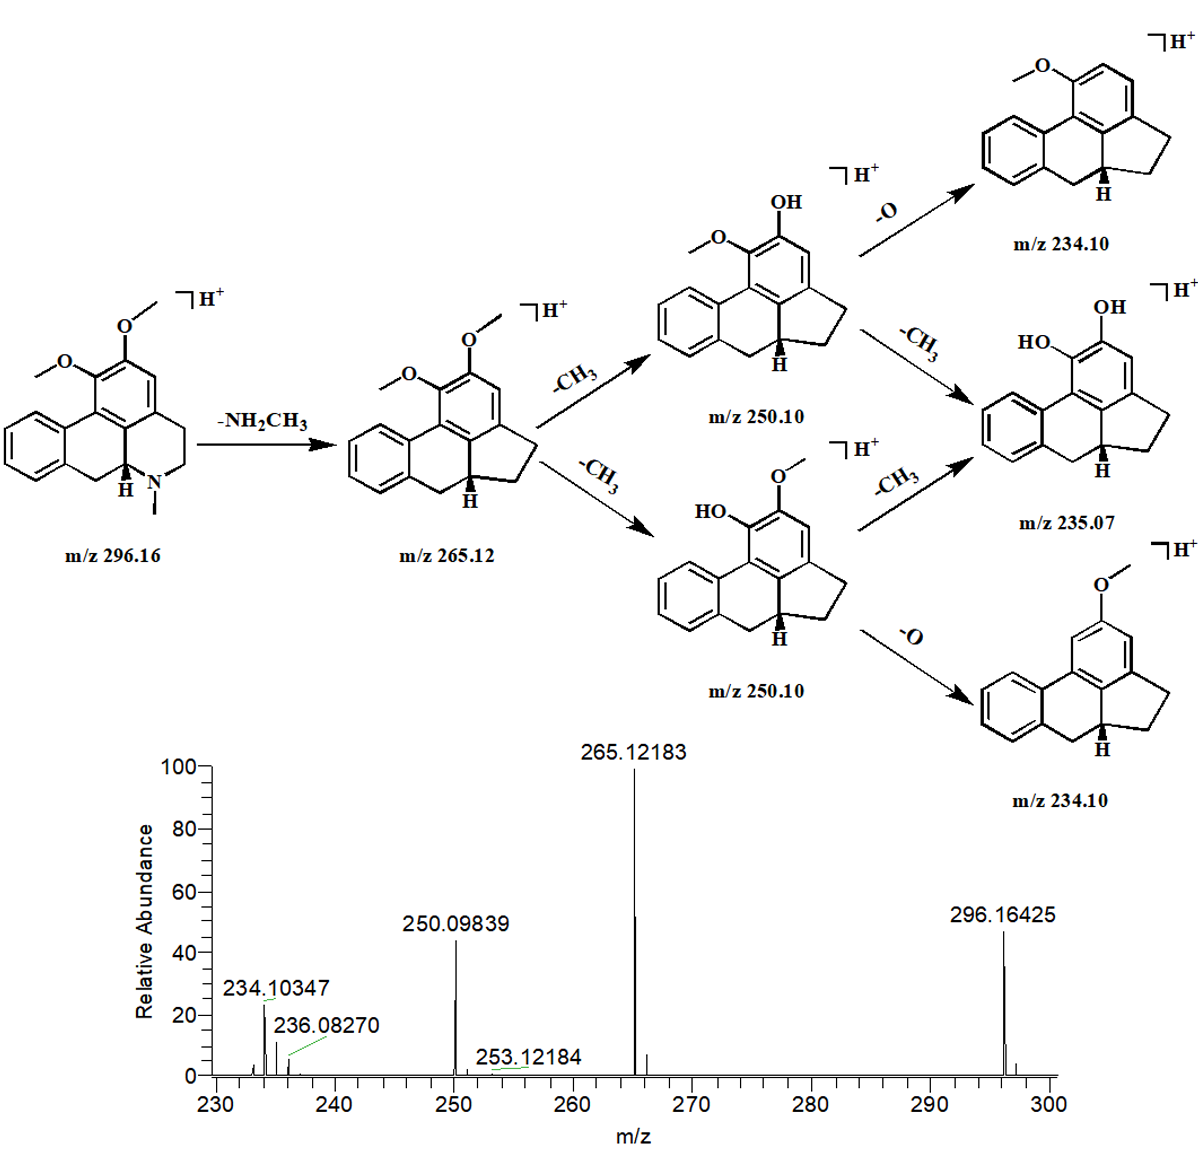


**Figure S3.** The proposed fragmentation pathways and the MS/MS spectra for nuciferine in the positive mode.
